# Supplementary material for: A bifunctional catalyst of ultrathin cobalt selenide nanosheets for plastic-electroreforming-assisted green hydrogen generation
Source: Royal Society of Chemistry journal article supplement (doi:10.1039/d2ta04286j), 2022-01-01
Supplement: d2ta04286j1.pdf [file d2ta04286j1.pdf]

## Electronic Supplementary Material

### **Bifunctional Catalyst of Ultrathin Cobalt Selenide Nanosheets for Plastic- Electroreforming-Assisted Green Hydrogen Generation**

**Ying Li,<sup>ab</sup> Yunxing Zhao,<sup>a</sup> Hu Zhao,<sup>b</sup> Zilei Wang,<sup>a</sup> Hong Li,<sup>\*b</sup> and Pingqi  
Gao<sup>\*a</sup>**

<sup>a</sup> *School of Materials, Guangdong Provincial Key Laboratory of Photovoltaic Technology, State Key Laboratory of Optoelectronic Materials and Technologies, Sun Yat-sen University, Guangzhou, 510275, China.*

<sup>b</sup> *School of Mechanical and Aerospace Engineering, Nanyang Technological University, 639798, Singapore*

\* Corresponding authors.

E-mail addresses: ehongli@ntu.edu.sg (H. Li), gaopq3@mail.sysu.edu.cn (P. Gao)

## 1. Experimental

### 1.1. Reagents and chemicals

Nickel foam (NF) was purchased from Guangzhou Muxi Biological Technology Co., Ltd., Isopropyl alcohol ((CH<sub>3</sub>)<sub>2</sub>CHOH), potassium hydroxide (KOH) and selenium (Se) were obtained from Shanghai Aladdin Biochemical Technology Co., Ltd. Ethanol (CH<sub>3</sub>CH<sub>2</sub>OH) was purchased from Tianjin Baishi Chemical Co., Ltd. Hydrochloric acid (HCl) was obtained from Guangzhou Rongman Biological Technology Co., Ltd. Cobaltous Chloride (CoCl<sub>2</sub>) and ammonium hydroxide (NH<sub>3</sub>·H<sub>2</sub>O) were purchased from Sigma-Aldrich Co., Acetone (CH<sub>3</sub>COCH<sub>3</sub>) was obtained from Guangzhou Xinhong Trading Co., Ltd. Hydrazine hydrate (N<sub>2</sub>H<sub>4</sub>) was purchased from Guangzhou Yueyang Chemical Co., Ltd. The commercial 20% Pt on Vulcan XC-72 carbon (Pt/C) was obtained from Cabot Corp and the ruthenium (IV) oxide (RuO<sub>2</sub>) was obtained from Shanghai Macklin Biochemical Co., Ltd. The polylactic acid (PLA, Mw=10, 000 g/mol) was purchased from Shanghai Yuanye Biotechnology Co., Ltd.

### 1.2. The synthesis of catalyst

#### 1.2.1 Preparation of Co(OH)<sub>2</sub> nanosheet on Ni foam [Co(OH)<sub>2</sub>/NF]

The Co(OH)<sub>2</sub> nanosheet was grown on 1 cm×1 cm nickel foam (NF) by a simple one-step hydrothermal treatment. In brief, NF was first washed sequentially with acetone, HCl and ethanol for 15 minutes to remove the organic substance and oxide layer on the surface. The cleaned NF was directly immersed into a solution containing 1 mL 0.1 M CoCl<sub>2</sub> and 0.3 mL NH<sub>3</sub>·H<sub>2</sub>O for 30 min, allowing the mixed solution to penetrate the three-dimensional (3D) pores of the NF. Subsequently, 0.45 mL N<sub>2</sub>H<sub>4</sub> was added to the above mixed solution and maintained at 40°C for 12 h. After reaction, Co(OH)<sub>2</sub>/NF was washed with water, and dried at 75 °C for 10 h.

#### 1.2.2 Preparation of CoSe<sub>2</sub> nanosheet on Ni foam (CoSe<sub>2</sub>/NF) from Co(OH)<sub>2</sub>/NF

In a typical procedure, different amounts of Se powder (such as 0.02 g, 0.1 g and 0.5 g), as a selenium source, was put into a porcelain boat and placed in upstream of a tube furnace. A piece of Co(OH)<sub>2</sub>/NF was placed in another porcelain boat seated in the center of the heating area of the tube furnace. At the same time, the tube furnace was heated to 400 °C with a heating rate of 10 °C min<sup>-1</sup> and kept for 2 h in Ar atmosphere, resulting in the conversion of Co(OH)<sub>2</sub>/NF to CoSe<sub>2</sub>/NF. The resultant samples were denoted as 0.02-CoSe<sub>2</sub>/NF, 0.1-CoSe<sub>2</sub>/NF and 0.5-CoSe<sub>2</sub>/NF, respectively. Finally, the product was taken out after natural cooling to room temperature and cleaned repeatedly with water, and dried at 75 °C for 10 h.

For comparison, we directly placed Co(OH)<sub>2</sub>/NF in a porcelain boat seated in the center of the heating zone of the tube furnace. At the same time, the tube furnace was heated to 400 °C

at rate of 10 °C min<sup>-1</sup> and kept for 2 h in air, resulting in the conversion of Co(OH)<sub>2</sub>/NF to Co<sub>3</sub>O<sub>4</sub>/NF.

### **1.3. Morphological, structural and compositional characterizations**

Scanning electron microscopy (SEM) and energy-dispersive spectrometry (EDS) measurement were executed to access Co(OH)<sub>2</sub>/NF and CoSe<sub>2</sub>/NF with a SU-8010 instrument. X-ray diffraction (XRD) patterns were carried out with a PANalytical Empyrean X-ray diffractometer. X-ray photoelectron spectroscopy (XPS) data was captured from an ESCALAB 250 spectrometer (Thermo-VG Scientific). The nanosheets were detached from the substrate by strong ultrasound sonication and drop casted on a TEM grid. Transmission electron microscopy (TEM) and selected area electron diffraction (SAED) of these nanosheets were captured on a FEI TECNAI G2F30 instrument. Atomic Force Microscope (AFM) measurement was conducted on dimension fastscan bio.

### **1.4. Electrochemical measurements**

Electrochemical tests including linear sweep voltammetry (LSV), cyclic voltammetry (CV), electrochemical impedance spectroscopy (EIS), and chronopotentiometry were performed by a CHI-760 electrochemical analyzer with a three-electrode cell consisting of a reference electrode [saturated calomel electrode (SCE)], an auxiliary electrode (carbon rod) and a working electrode (electrocatalyst-modified NF). According to the equation  $E_{\text{RHE}} = E_{\text{SCE}} + 0.242 \text{ V} + 0.0591 \text{ pH}$ , all electrode potentials were calibrated to the reversible hydrogen electrode (RHE). In LSV curves, iR-corrected was compensated at 85% through the positive feedback model using the CHI-760 electrochemical analyzer. And before the HER and PLA electrooxidation performance testing, repeated cyclic voltammetry scans were applied to stabilize the catalyst surface.

The CoSe<sub>2</sub>/NF can directly act as the working electrode. Precise weighing revealed the loading mass of CoSe<sub>2</sub> nanosheet on NF substrate was about 1.5 mg cm<sup>-2</sup>.

The specific preparation procedures of commercial Pt/C/NF and RuO<sub>2</sub>/NF with a loading mass of 1.5 mg cm<sup>-2</sup> are as follows. The Pt/C and RuO<sub>2</sub> suspensions were prepared by dispersing 2 mg Pt/C or RuO<sub>2</sub> into 200 μL isopropyl alcohol, 785 μL water and 15 μL Nafion, respectively. Then, 750 μL of the prepared suspension was carefully loaded onto the NF substrate and dried at 40 °C.

### **1.5. Faradaic efficiency**

The Faradaic efficiency PLA oxidation to acetic acid (FE) can be calculated by equation  $FE_{\text{(acetic acid)}} = (4F \times n_{\text{(acetic acid)}}) / Q$ , where F is Faraday constant (96,485 C mol<sup>-1</sup>),  $n_{\text{(acetic acid)}}$  is the moles of the acetic acid produced, and Q is the total charge passed across the electrode.

## 2. Supplementary Figures

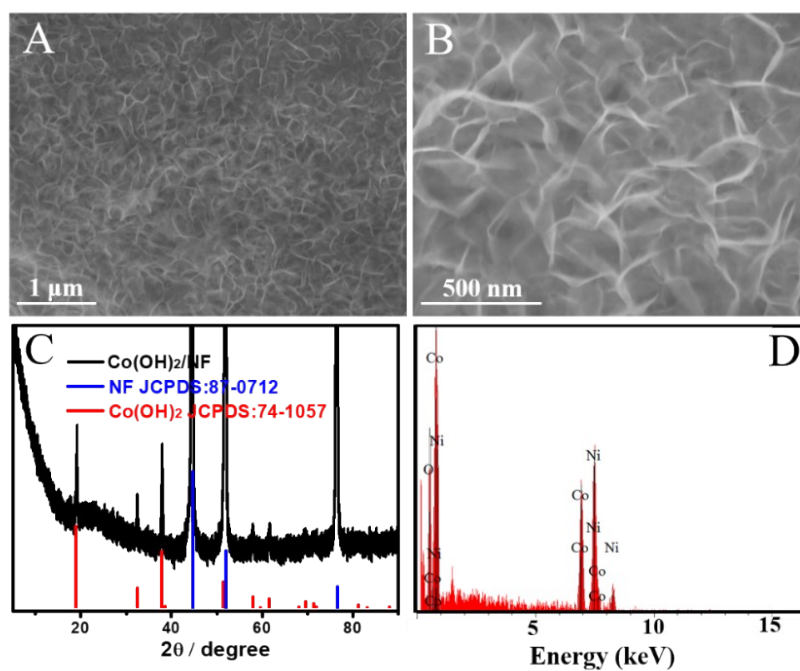

**Fig. S1.** Morphology characterization and composition analyses of  $\text{Co(OH)}_2/\text{NF}$ . (A, B) SEM images, (C) XRD pattern, and (D) EDX spectrum.

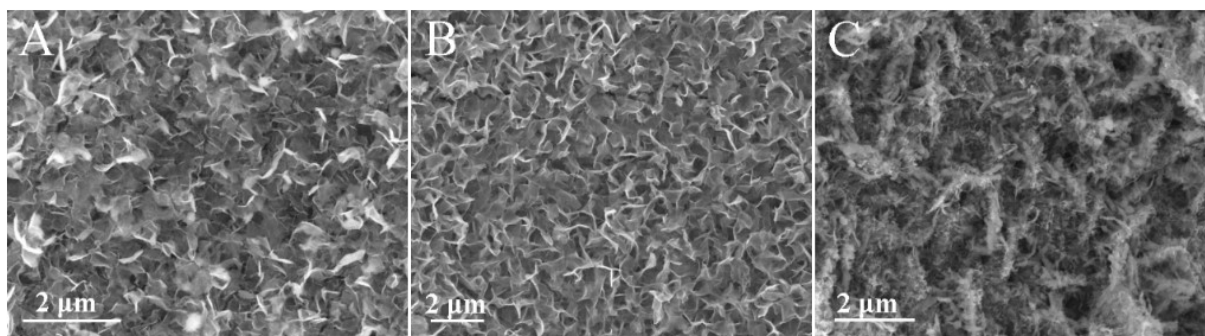

**Fig. S2.** SEM images of (A) 0.02- $\text{CoSe}_2/\text{NF}$ , (C) 0.1- $\text{CoSe}_2/\text{NF}$  and (D) 0.5- $\text{CoSe}_2/\text{NF}$ .

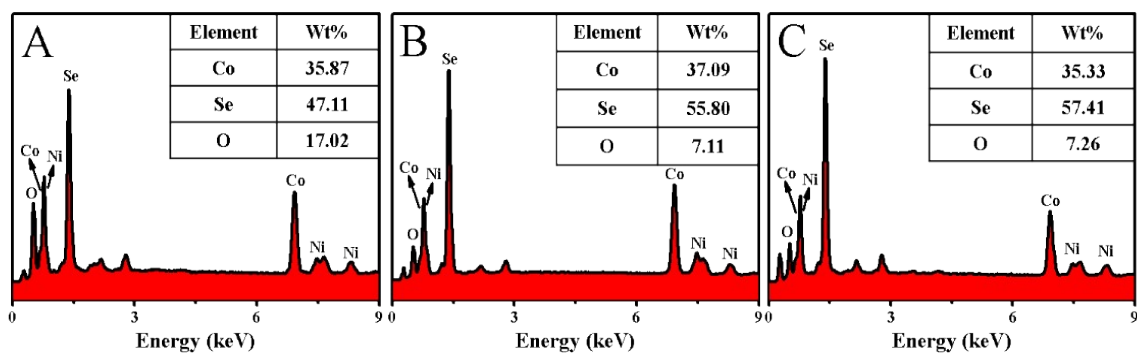

**Fig. S3.** SEM-EDS pattern of 0.02-CoSe<sub>2</sub>/NF, 0.1-CoSe<sub>2</sub>/NF and 0.5-CoSe<sub>2</sub>/NF.

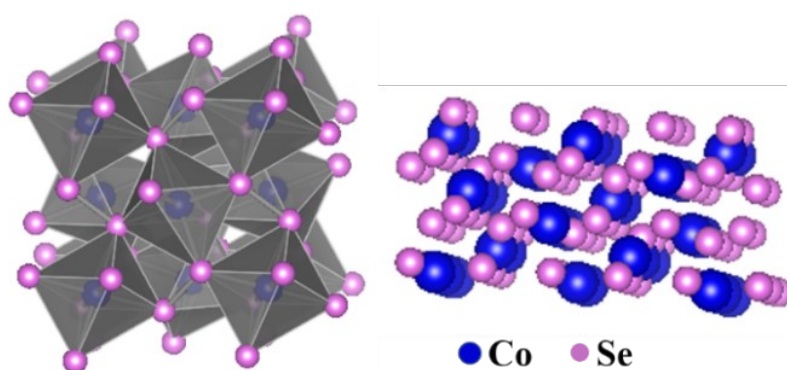

**Fig. S4.** The crystal structure of CoSe<sub>2</sub> (left) and the atomic model (right) of the CoSe<sub>2</sub> nanosheet (210) surface.

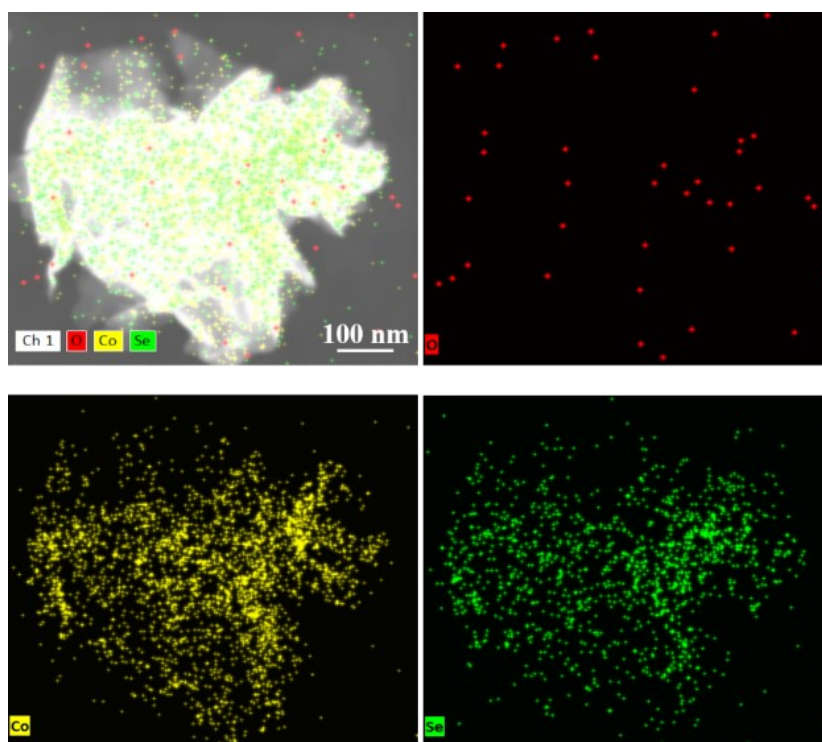

**Fig. S5.** TEM-EDX elemental maps of O, Ni, and Se of 0.1-CoSe<sub>2</sub> nanosheets.

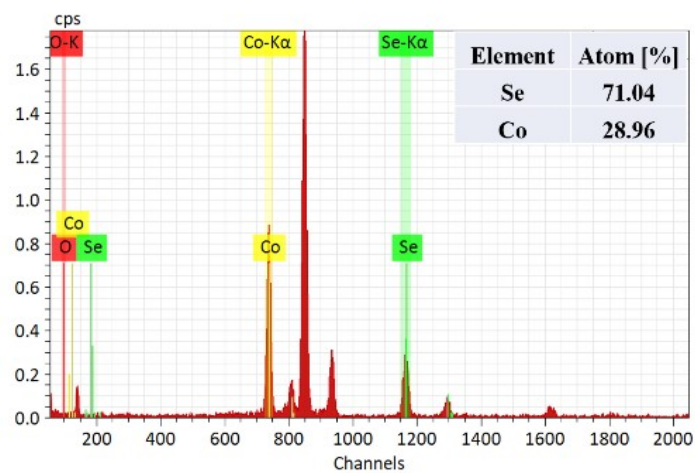

**Fig. S6.** EDX spectrum and quantification results of the nanosheets detached from 0.1-CoSe<sub>2</sub>/NF.

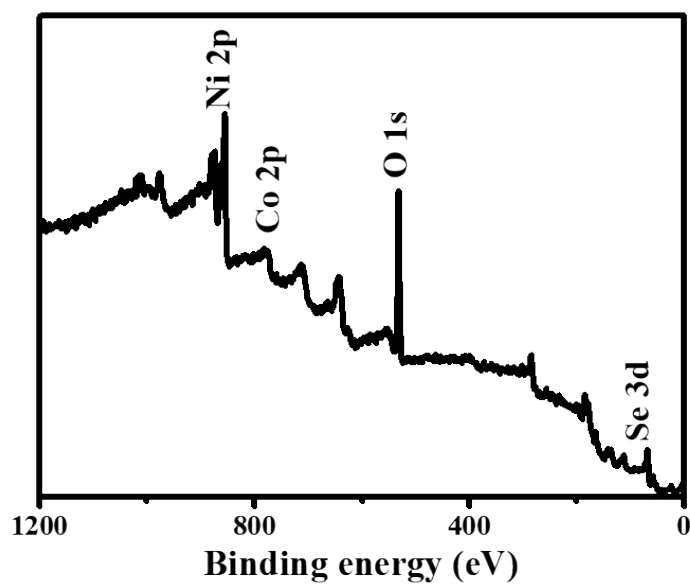

**Fig. S7.** XPS survey spectrum of 0.1-CoSe<sub>2</sub>/NF.

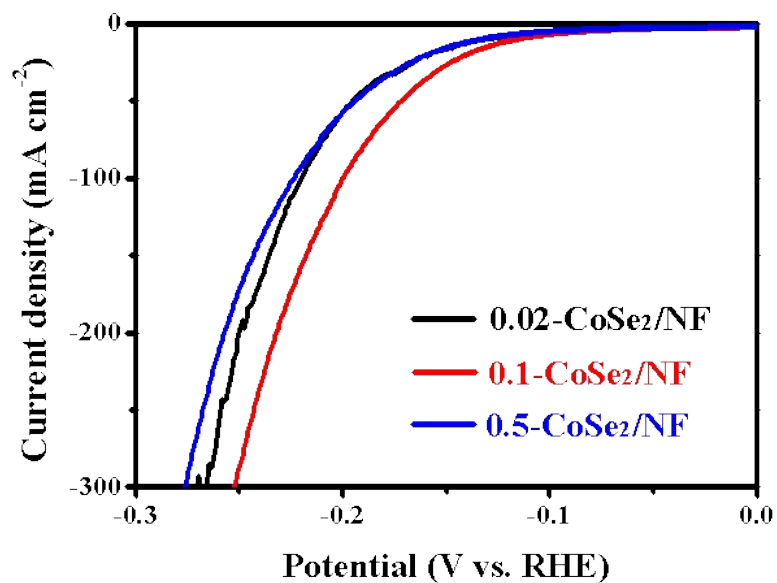

**Fig. S8.** iR-corrected LSV curves of 0.02-CoSe<sub>2</sub>/NF, 0.1-CoSe<sub>2</sub>/NF and 0.5-CoSe<sub>2</sub>/NF in 1 M KOH solution.

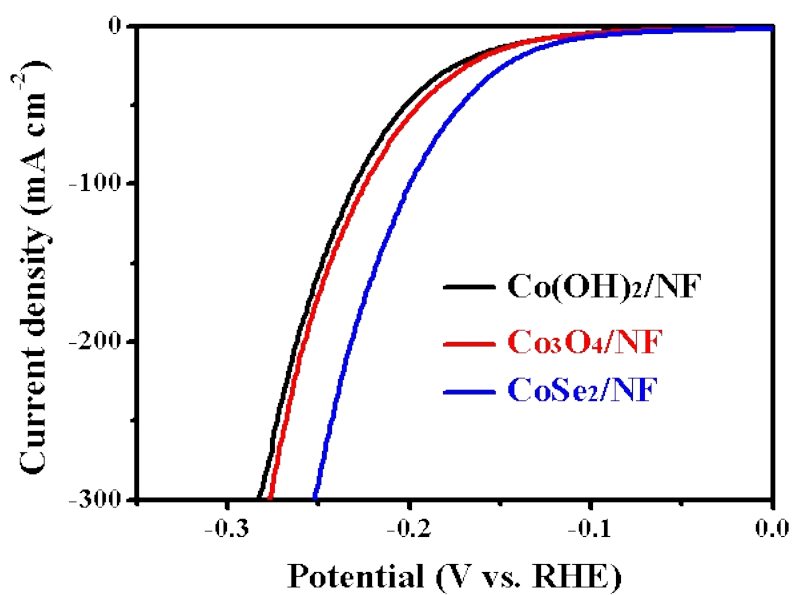

**Fig. S9.** iR-corrected LSV curves of the CoSe<sub>2</sub>/NF, Co<sub>3</sub>O<sub>4</sub>/NF and Co(OH)<sub>2</sub>/NF in 1 M KOH.

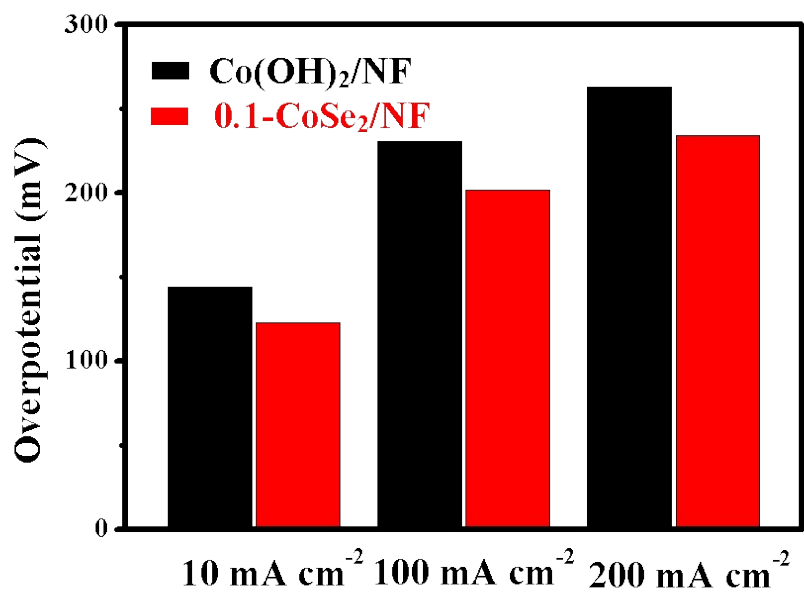

**Fig. S10.** Comparison of the overpotentials of Co(OH)<sub>2</sub>/NF and 0.1-CoSe<sub>2</sub>/NF at current densities of 10, 100 and 200 mA cm<sup>-2</sup>.

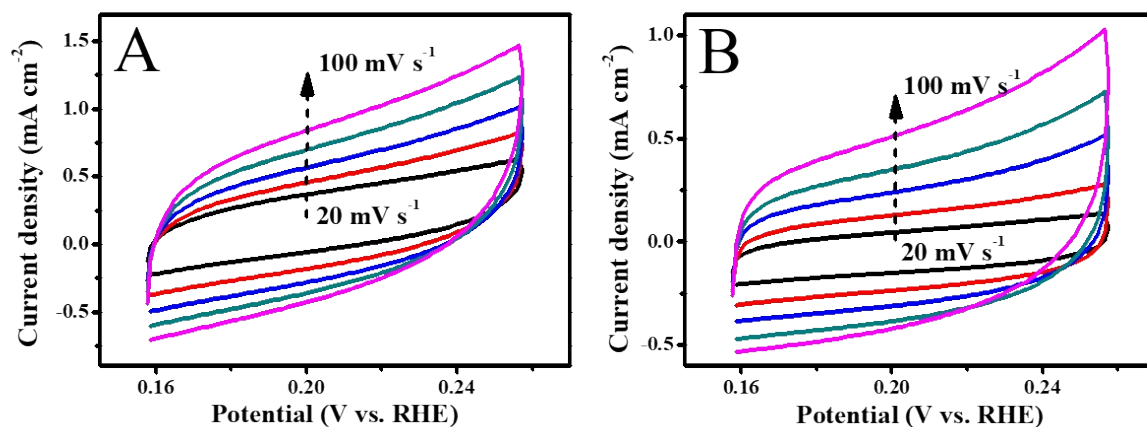

**Fig. S11.** CV curves and plots of the current density of (A) 0.1-CoSe<sub>2</sub>/NF and (B) Co(OH)<sub>2</sub>/NF.



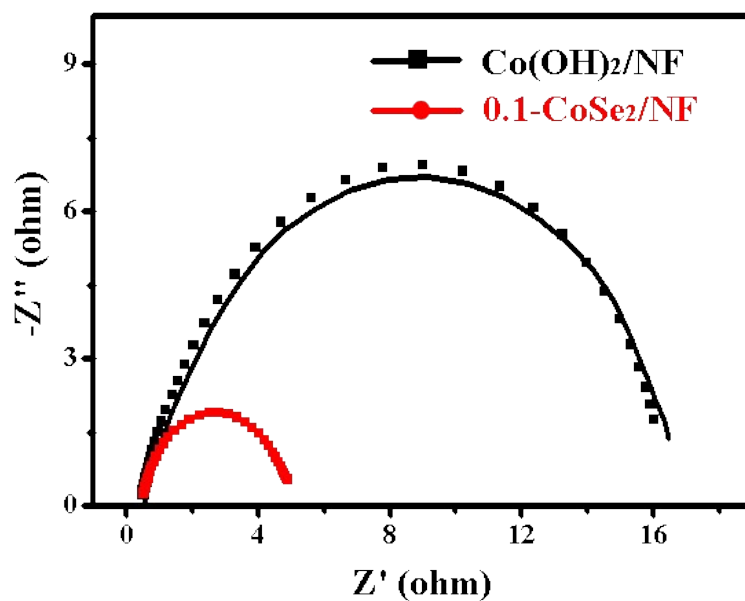

**Fig. S12.** Nyquist plots of 0.1-CoSe<sub>2</sub>/NF and Co(OH)<sub>2</sub>/NF in N<sub>2</sub>-saturated 1 M KOH solution at -0.1 V vs. RHE.

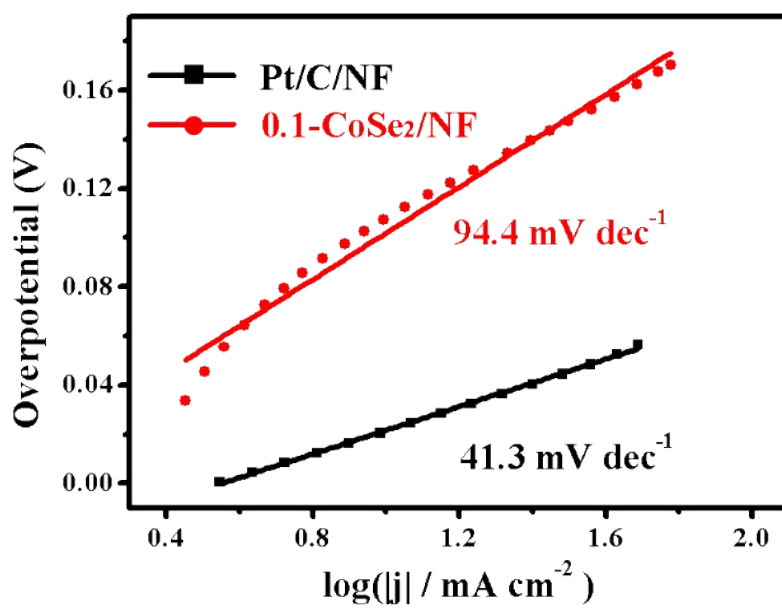

**Fig. S13.** Tafel plots of the 0.1-CoSe<sub>2</sub>/NF and Pt/C/NF.

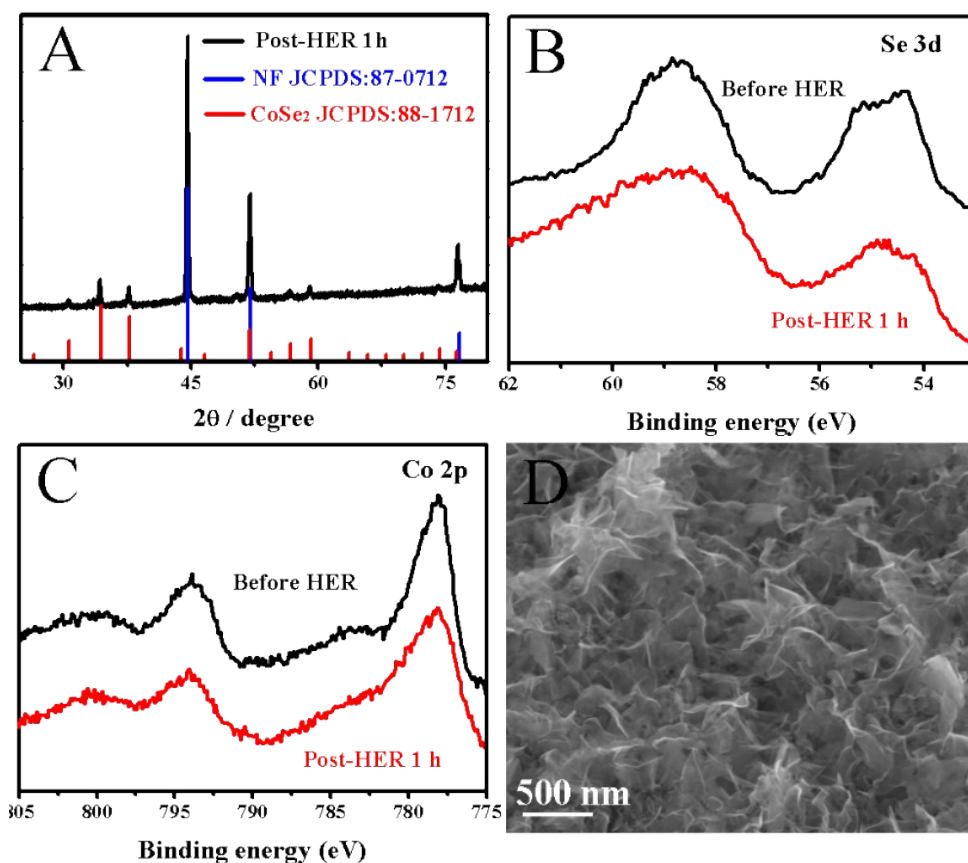

**Fig. S14.** Composition analyses and morphology characterization of 0.1-CoSe<sub>2</sub>/NF after HER test. (A) XRD pattern, high-resolution XPS spectra of (B) Se 3d and (C) Co 2p peaks of the 0.1-CoSe<sub>2</sub>/NF, (D) the SEM image of the 0.1-CoSe<sub>2</sub>/NF.

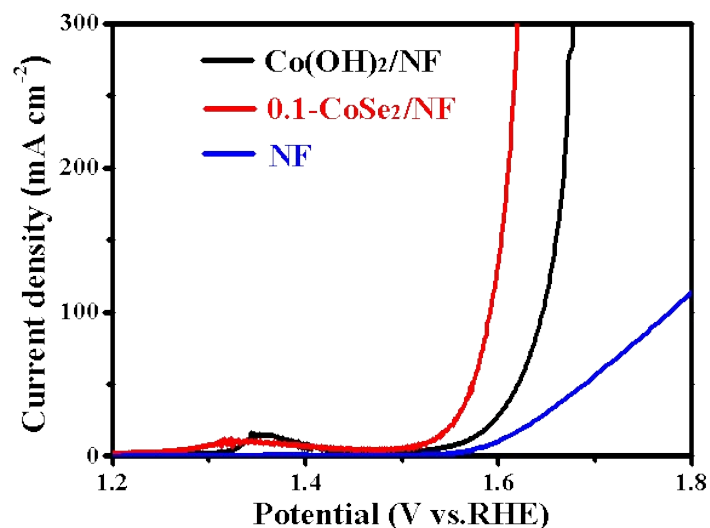

**Fig. S15.** LSV curves of 0.1-CoSe<sub>2</sub>/NF, Co(OH)<sub>2</sub>/NF, and bare NF in 1 M KOH electrolyte.

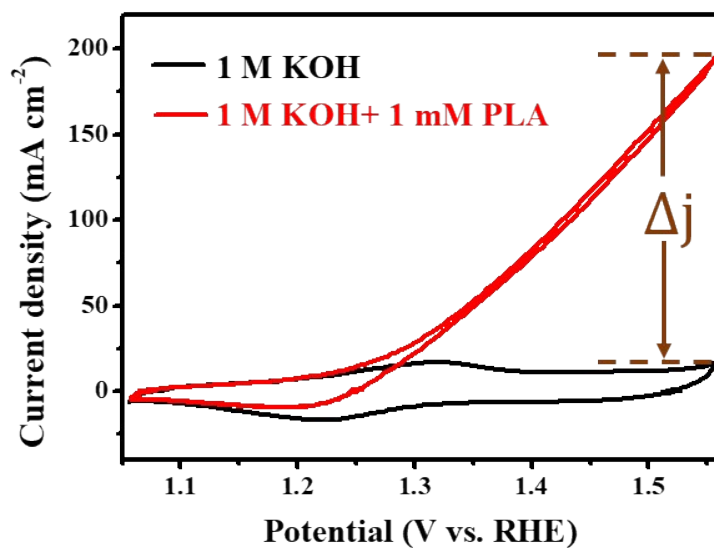

**Fig. S16.** CV curves of the 0.1-CoSe<sub>2</sub>/NF in 1 M KOH + 1 mM PLA electrolyte.

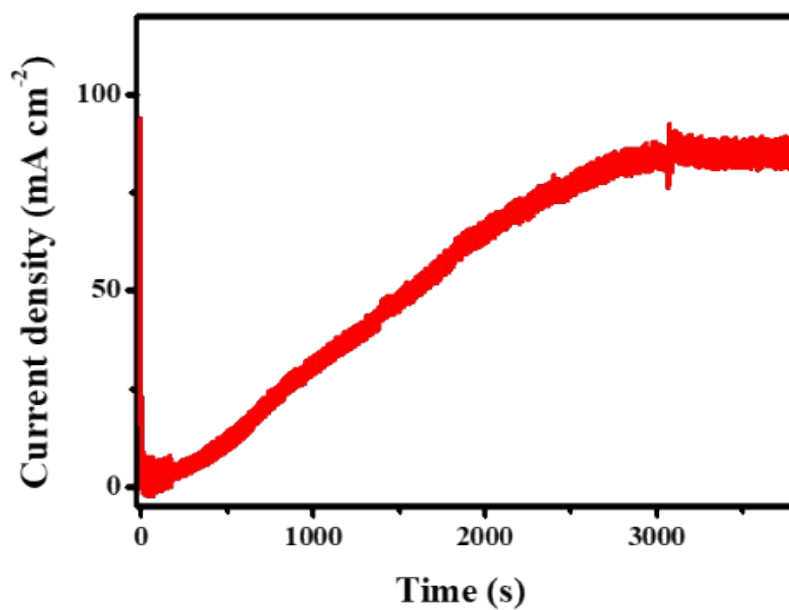

**Fig. S17.** Chronoamperometry curves of 0.1-CoSe<sub>2</sub>/NF at 1.45 V vs. RHE after adding PLA into 1 M KOH solution.

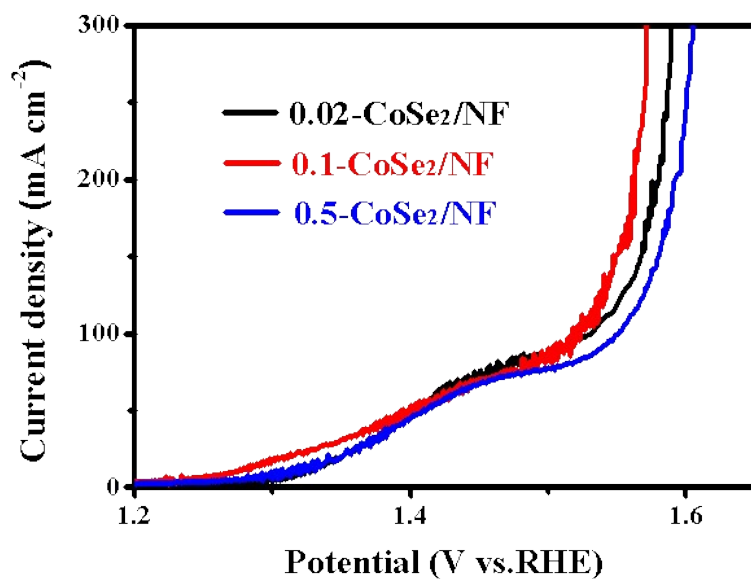

**Fig. S18.** LSV curves of 0.02-CoSe<sub>2</sub>/NF, 0.1-CoSe<sub>2</sub>/NF and 0.5-CoSe<sub>2</sub>/NF in 1 M KOH with 1mM PLA.

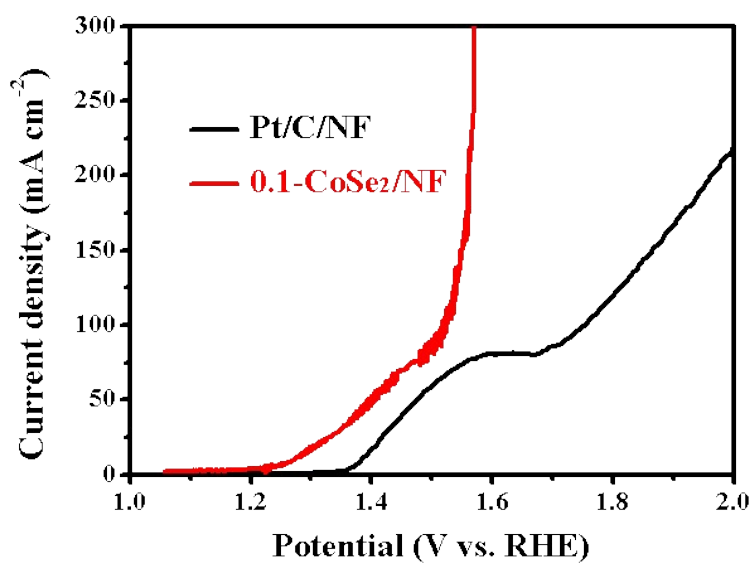

**Fig. S19.** LSV curves of 0.1-CoSe<sub>2</sub>/NF and Pt/C/NF for PLA oxidation.

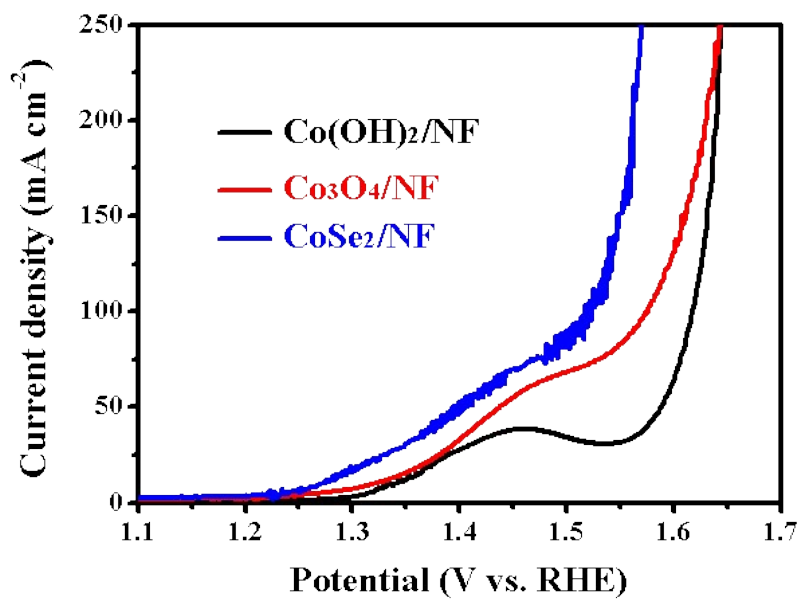

**Fig. S20.** LSV curves of the  $\text{CoSe}_2/\text{NF}$ ,  $\text{Co}_3\text{O}_4/\text{NF}$  and  $\text{Co(OH)}_2/\text{NF}$  in 1 M KOH with 1 mM PLA.

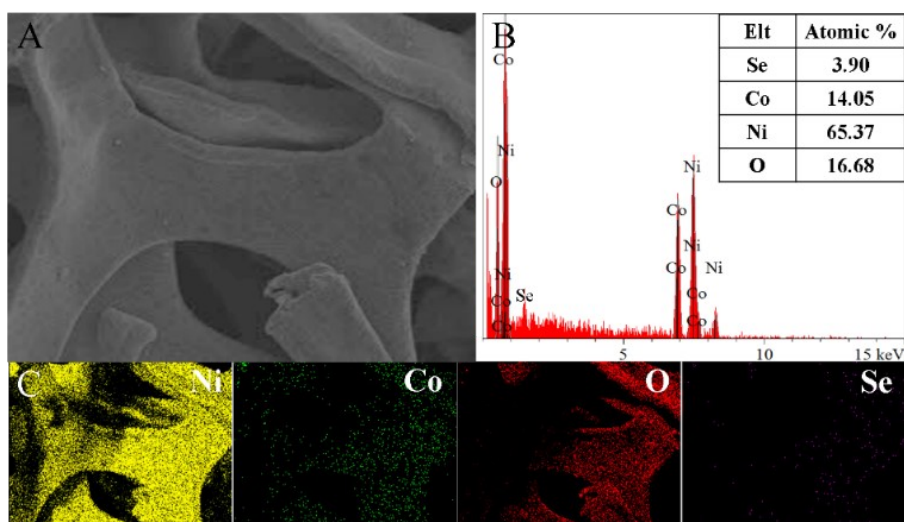

**Fig. S21.** Composition analyses of 0.1- $\text{CoSe}_2/\text{NF}$  after PLA electrooxidation test. (A) SEM images, (B) EDS spectral and (C) EDS mapping of the 0.1- $\text{CoSe}_2/\text{NF}$ .

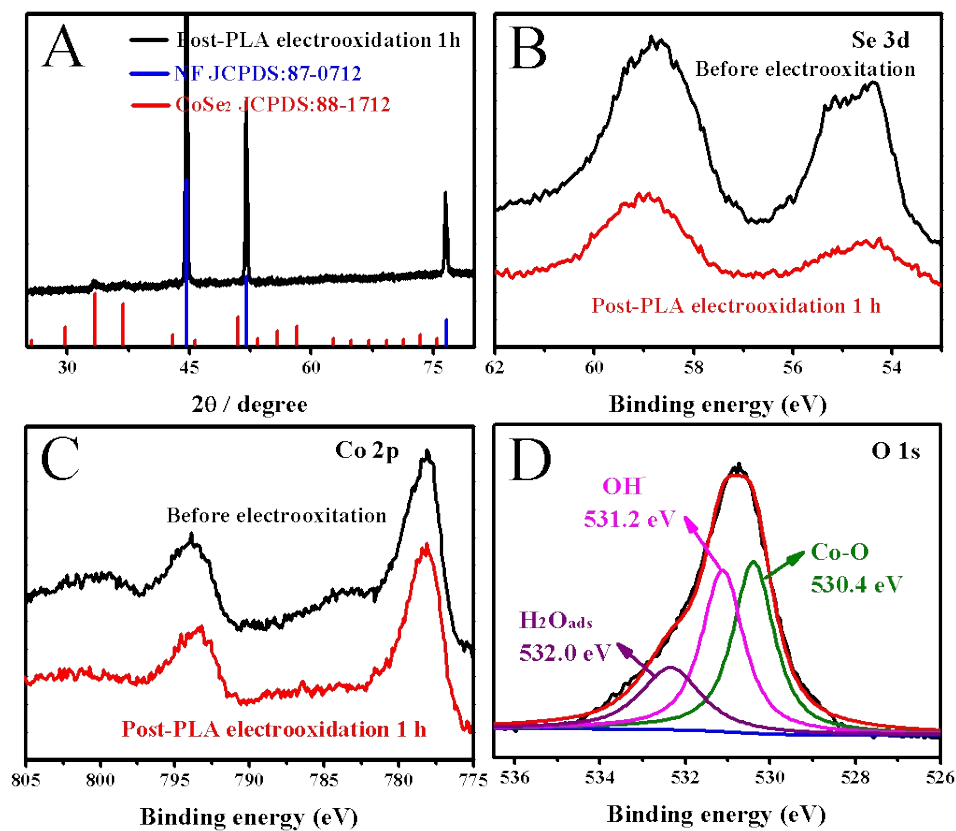

**Fig. S22.** Composition analyses of 0.1-CoSe<sub>2</sub>/NF after prolonged PLA electrooxidation test. (A) XRD pattern, high-resolution XPS spectra of (B) Se 3d, (C) Co 2p and (D) O 1s peaks of the 0.1-CoSe<sub>2</sub>/NF.

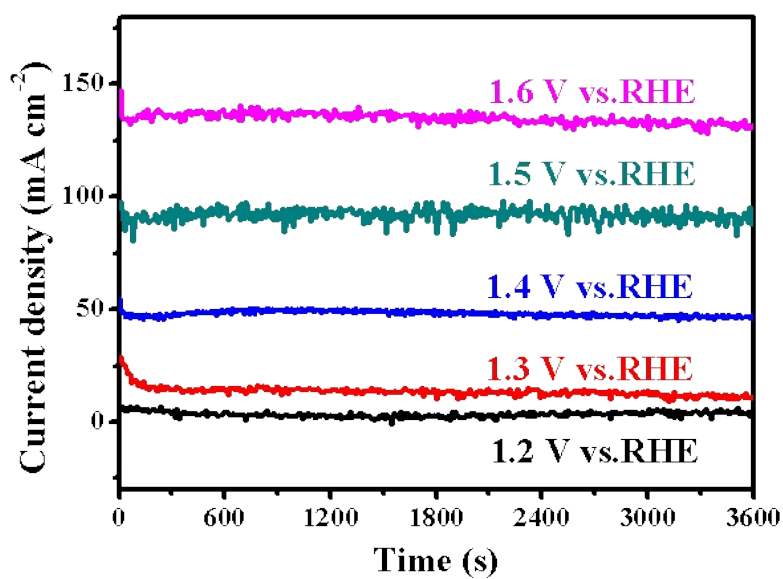

**Fig. S23.** Chronoamperometry results of 0.1-CoSe<sub>2</sub>/NF at the corresponding potentials.

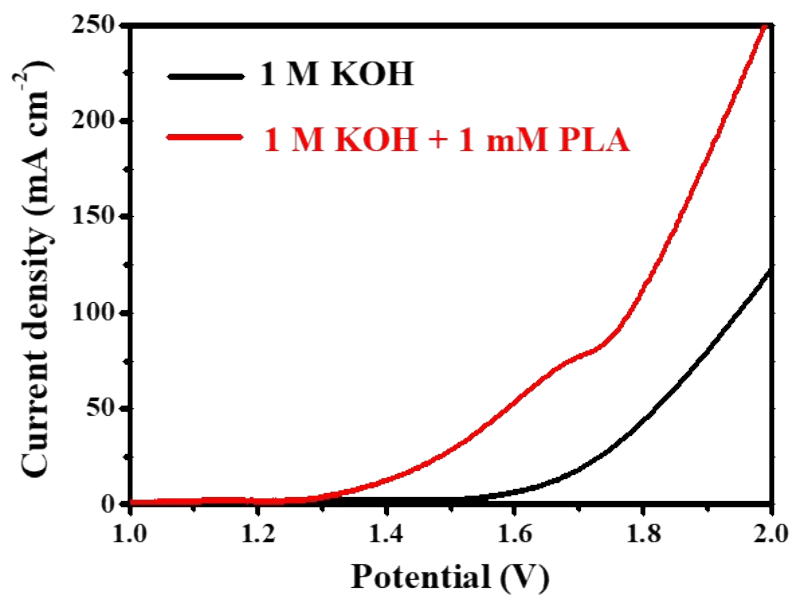

**Fig. S24.** Polarization curves of CoSe<sub>2</sub>/NF||CoSe<sub>2</sub>/NF in 1 M KOH with and without 1 mM PLA.
